# Supplementary material for: PD-L1 CAR effector cells induce self-amplifying cytotoxic effects against target cells
Source: PubMed Central journal article supplement (PMC8796262; doi:10.1136/jitc-2021-002500), 2022-01-24

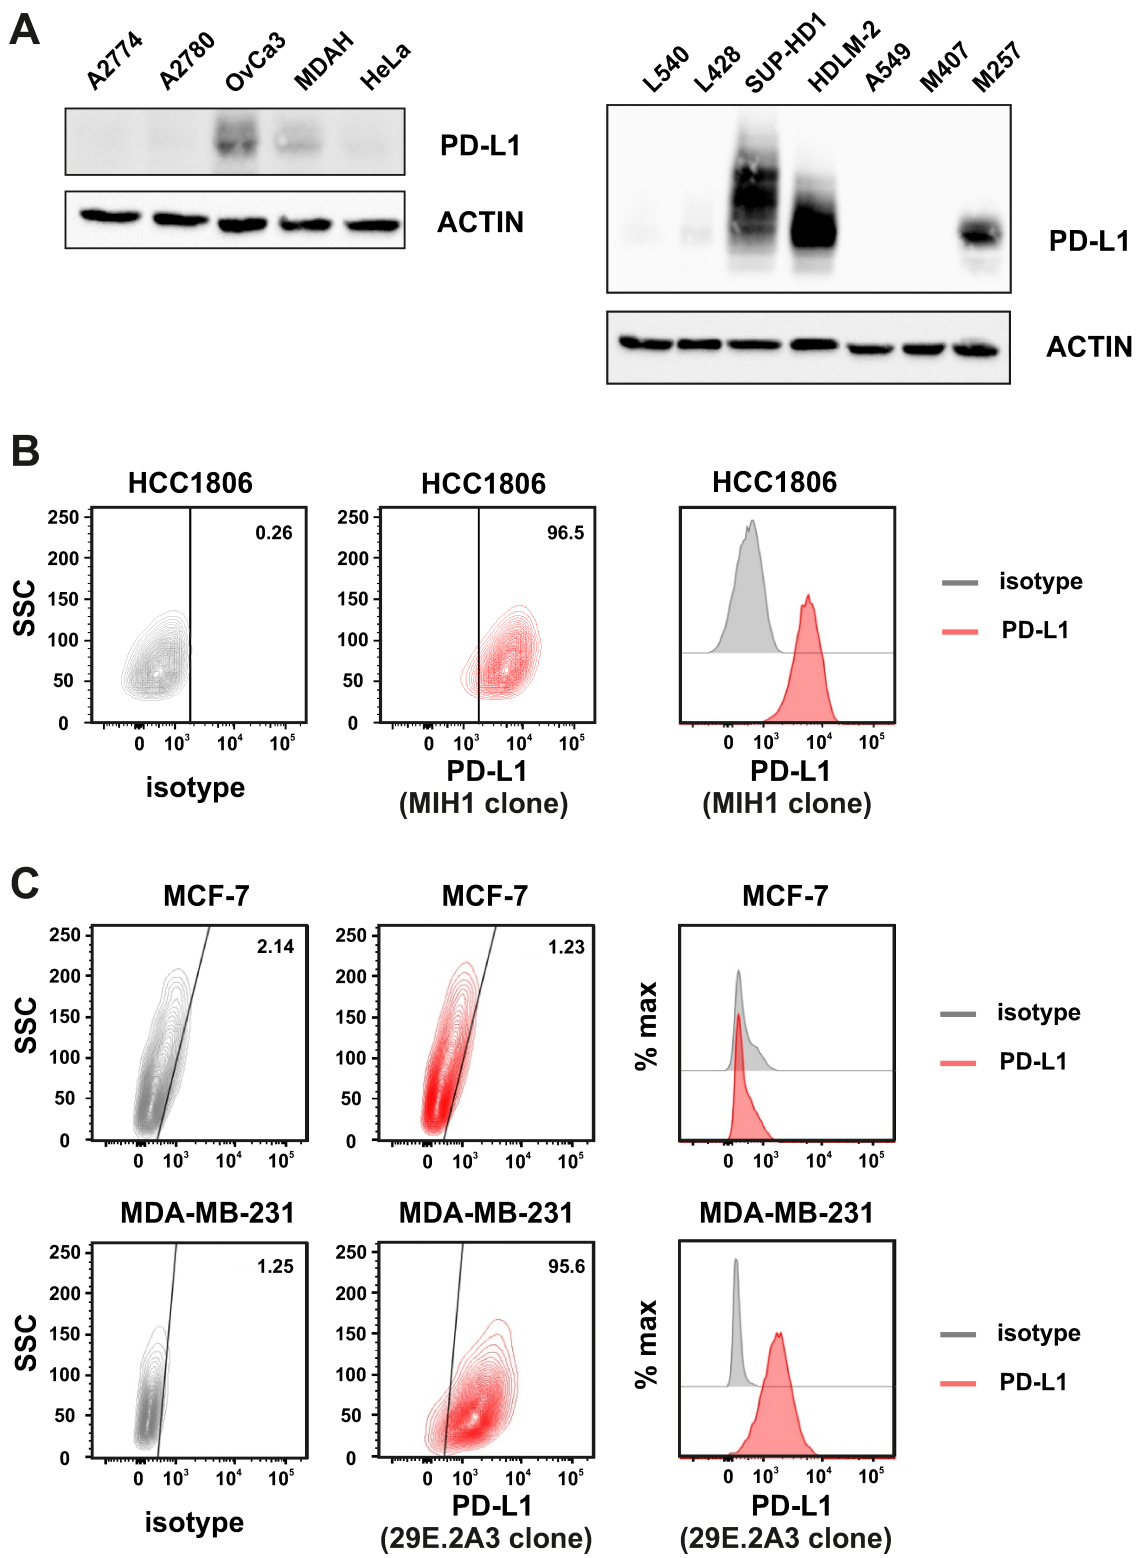

Suppl Fig.1

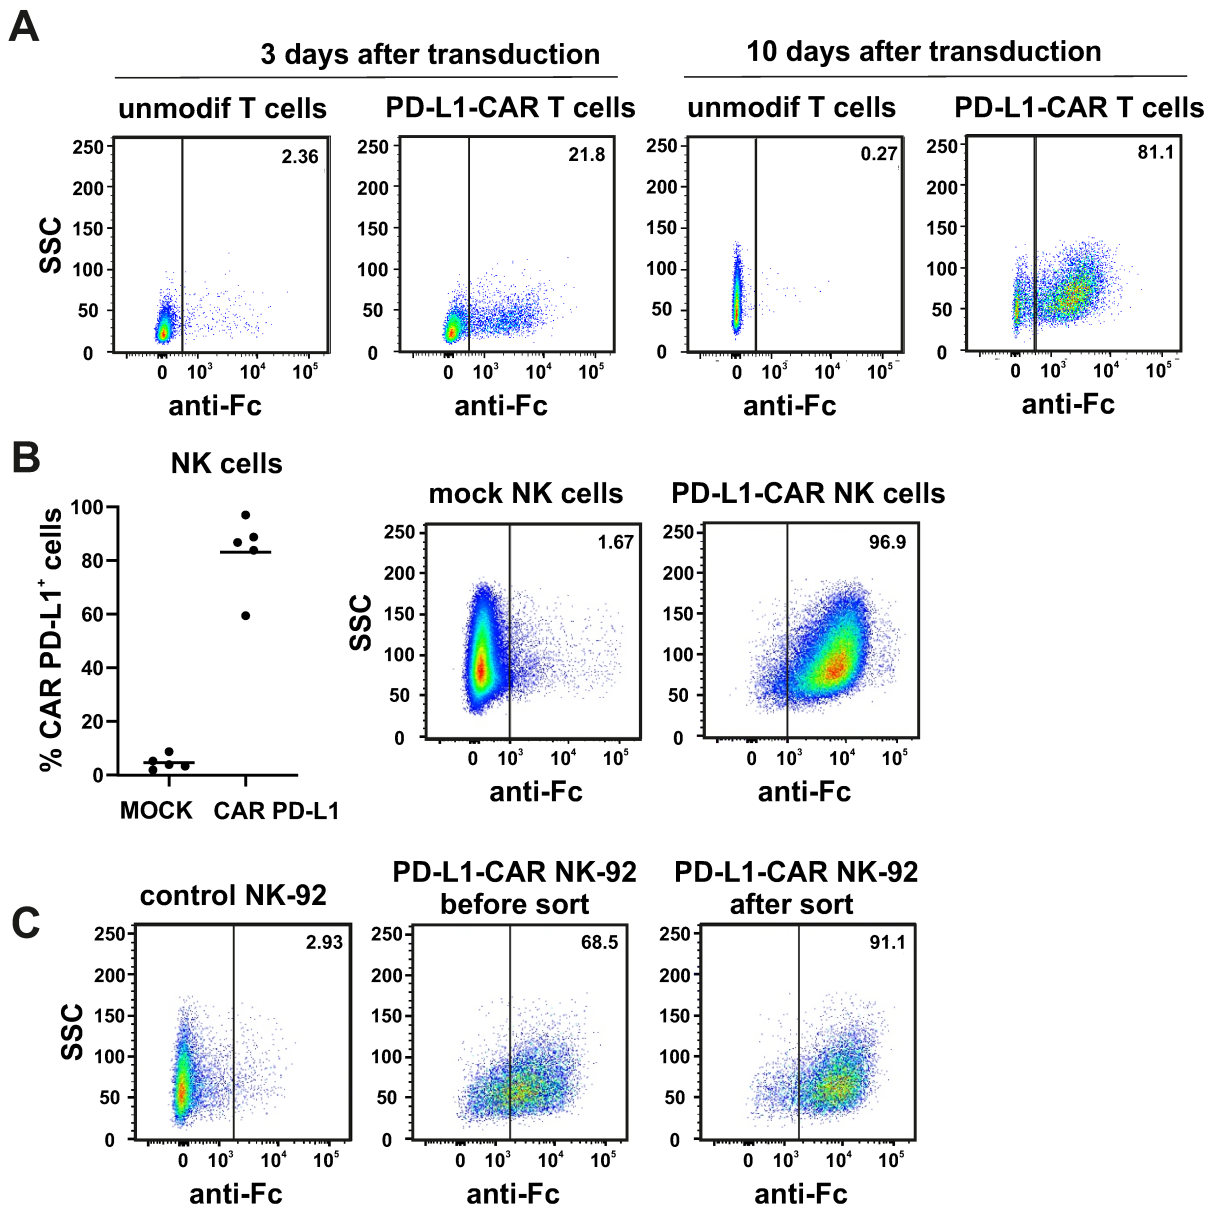

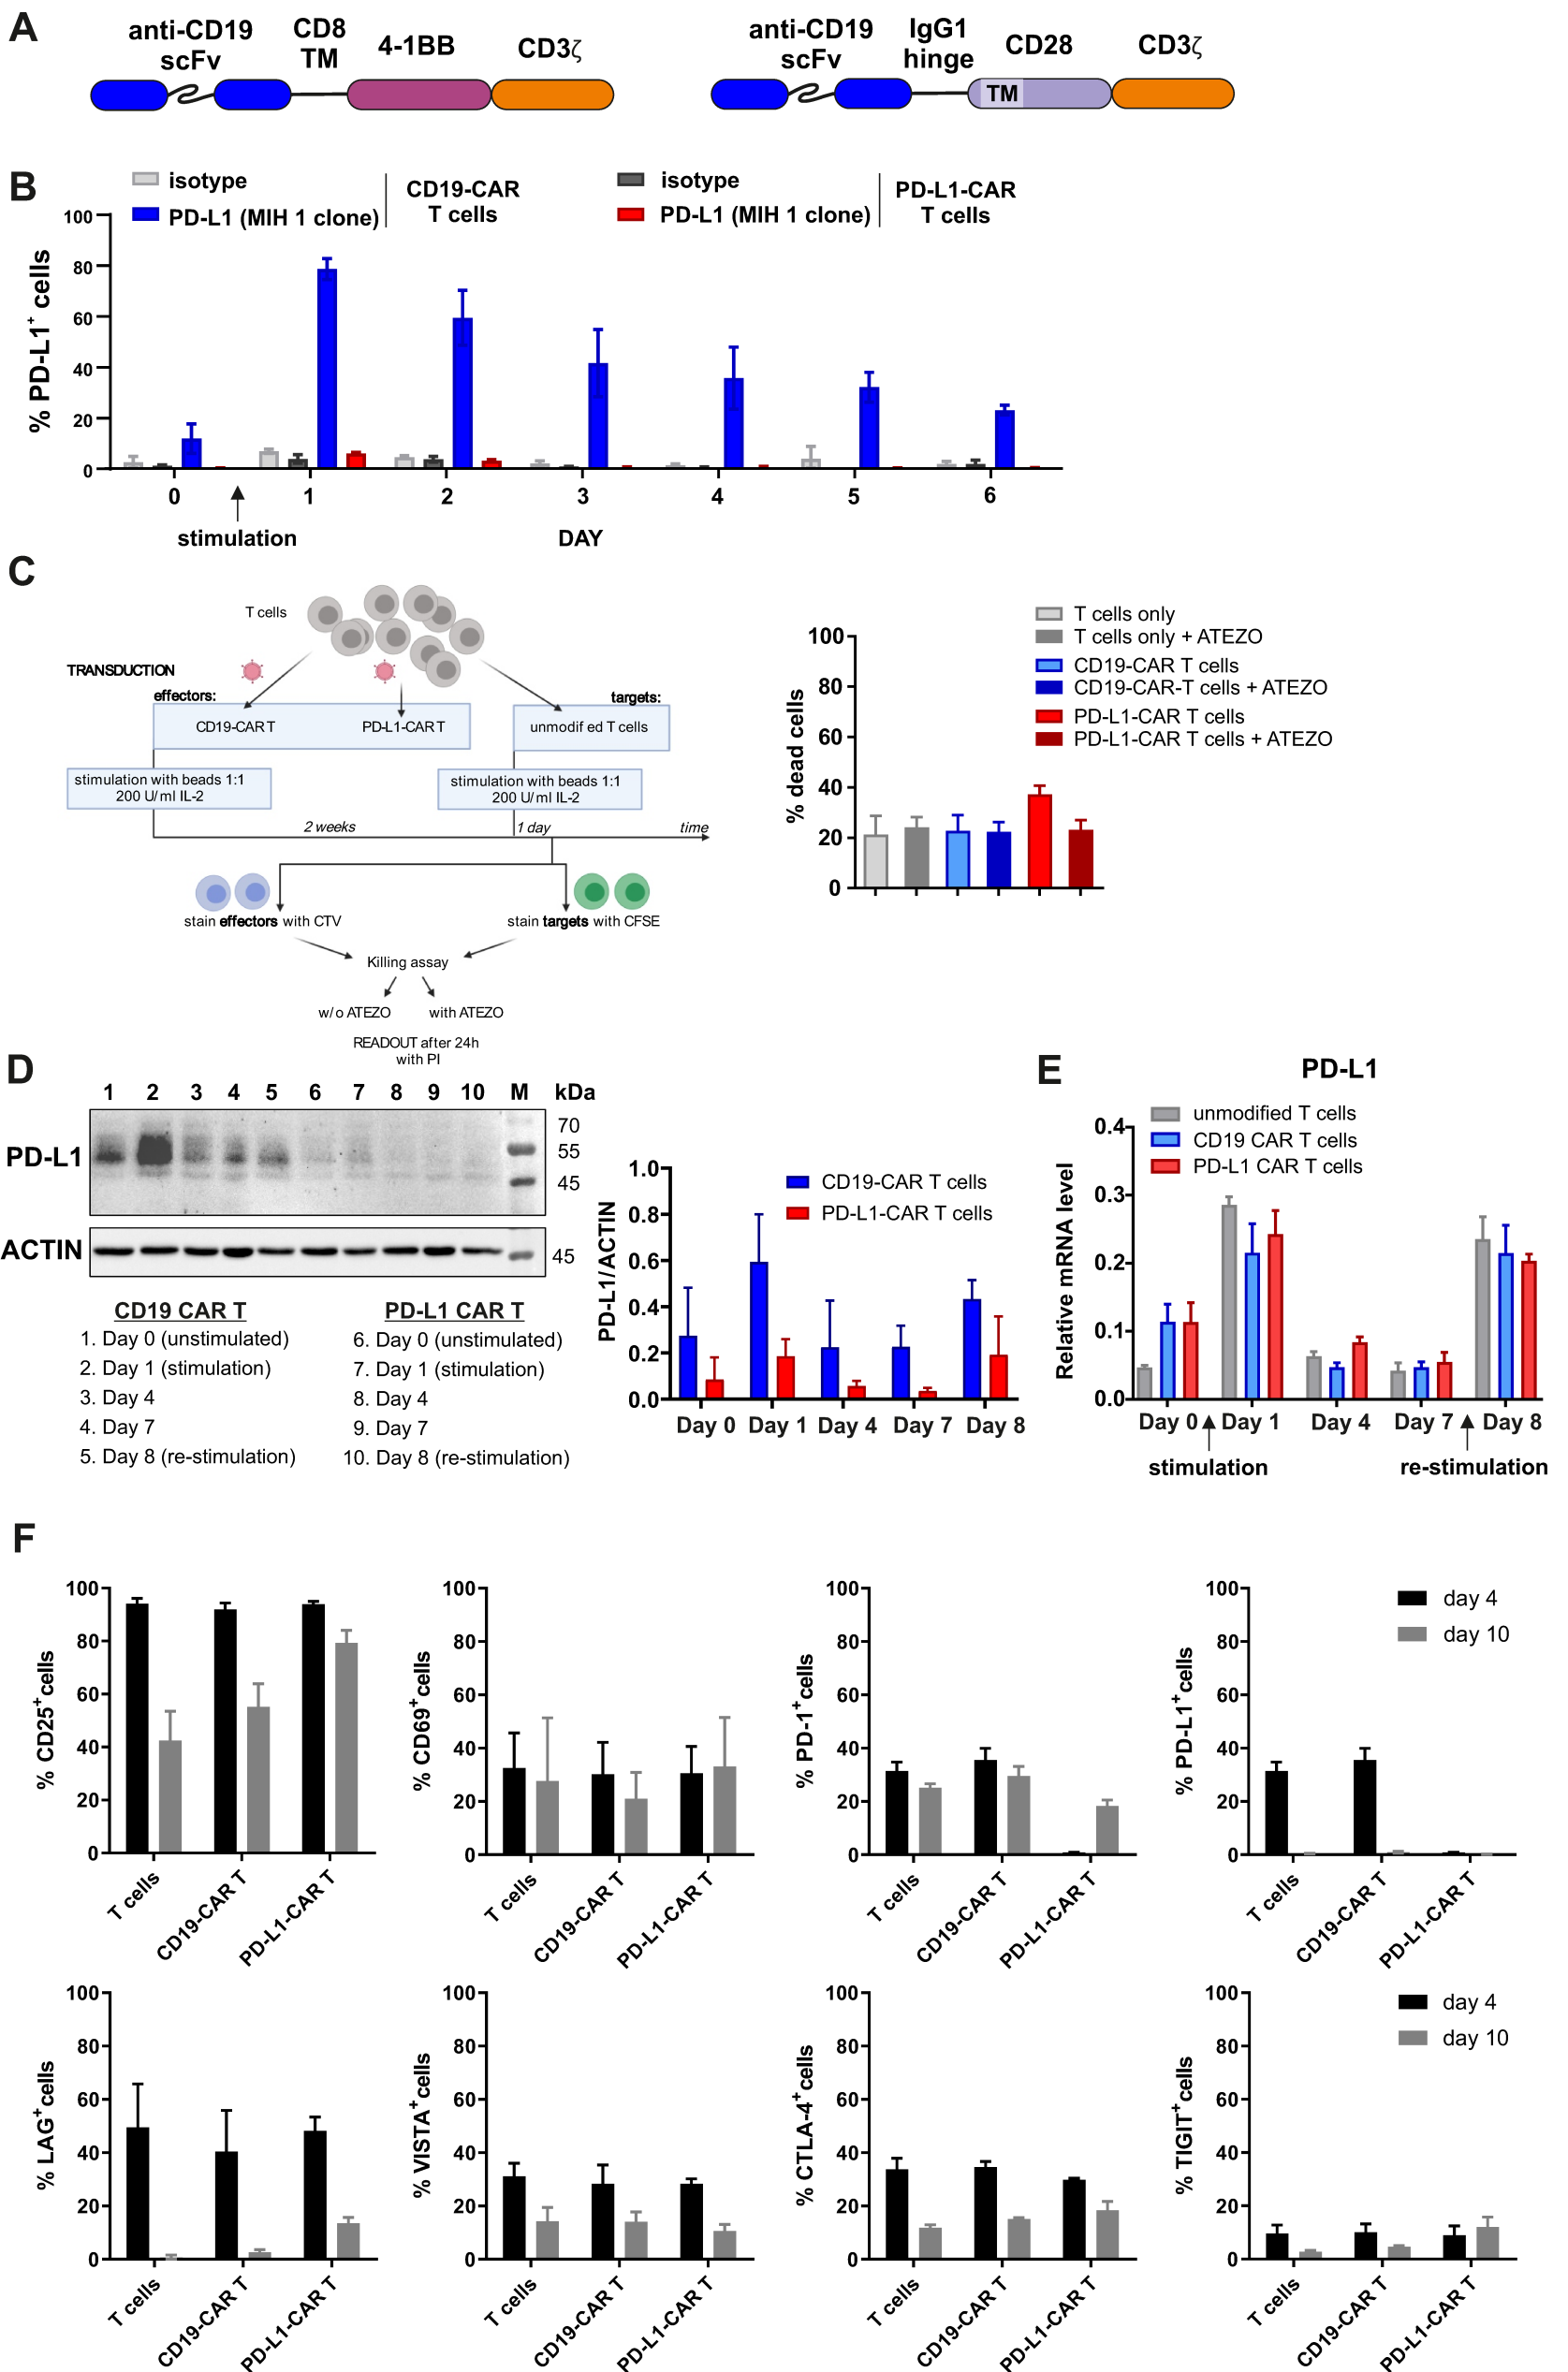

Suppl Fig.3

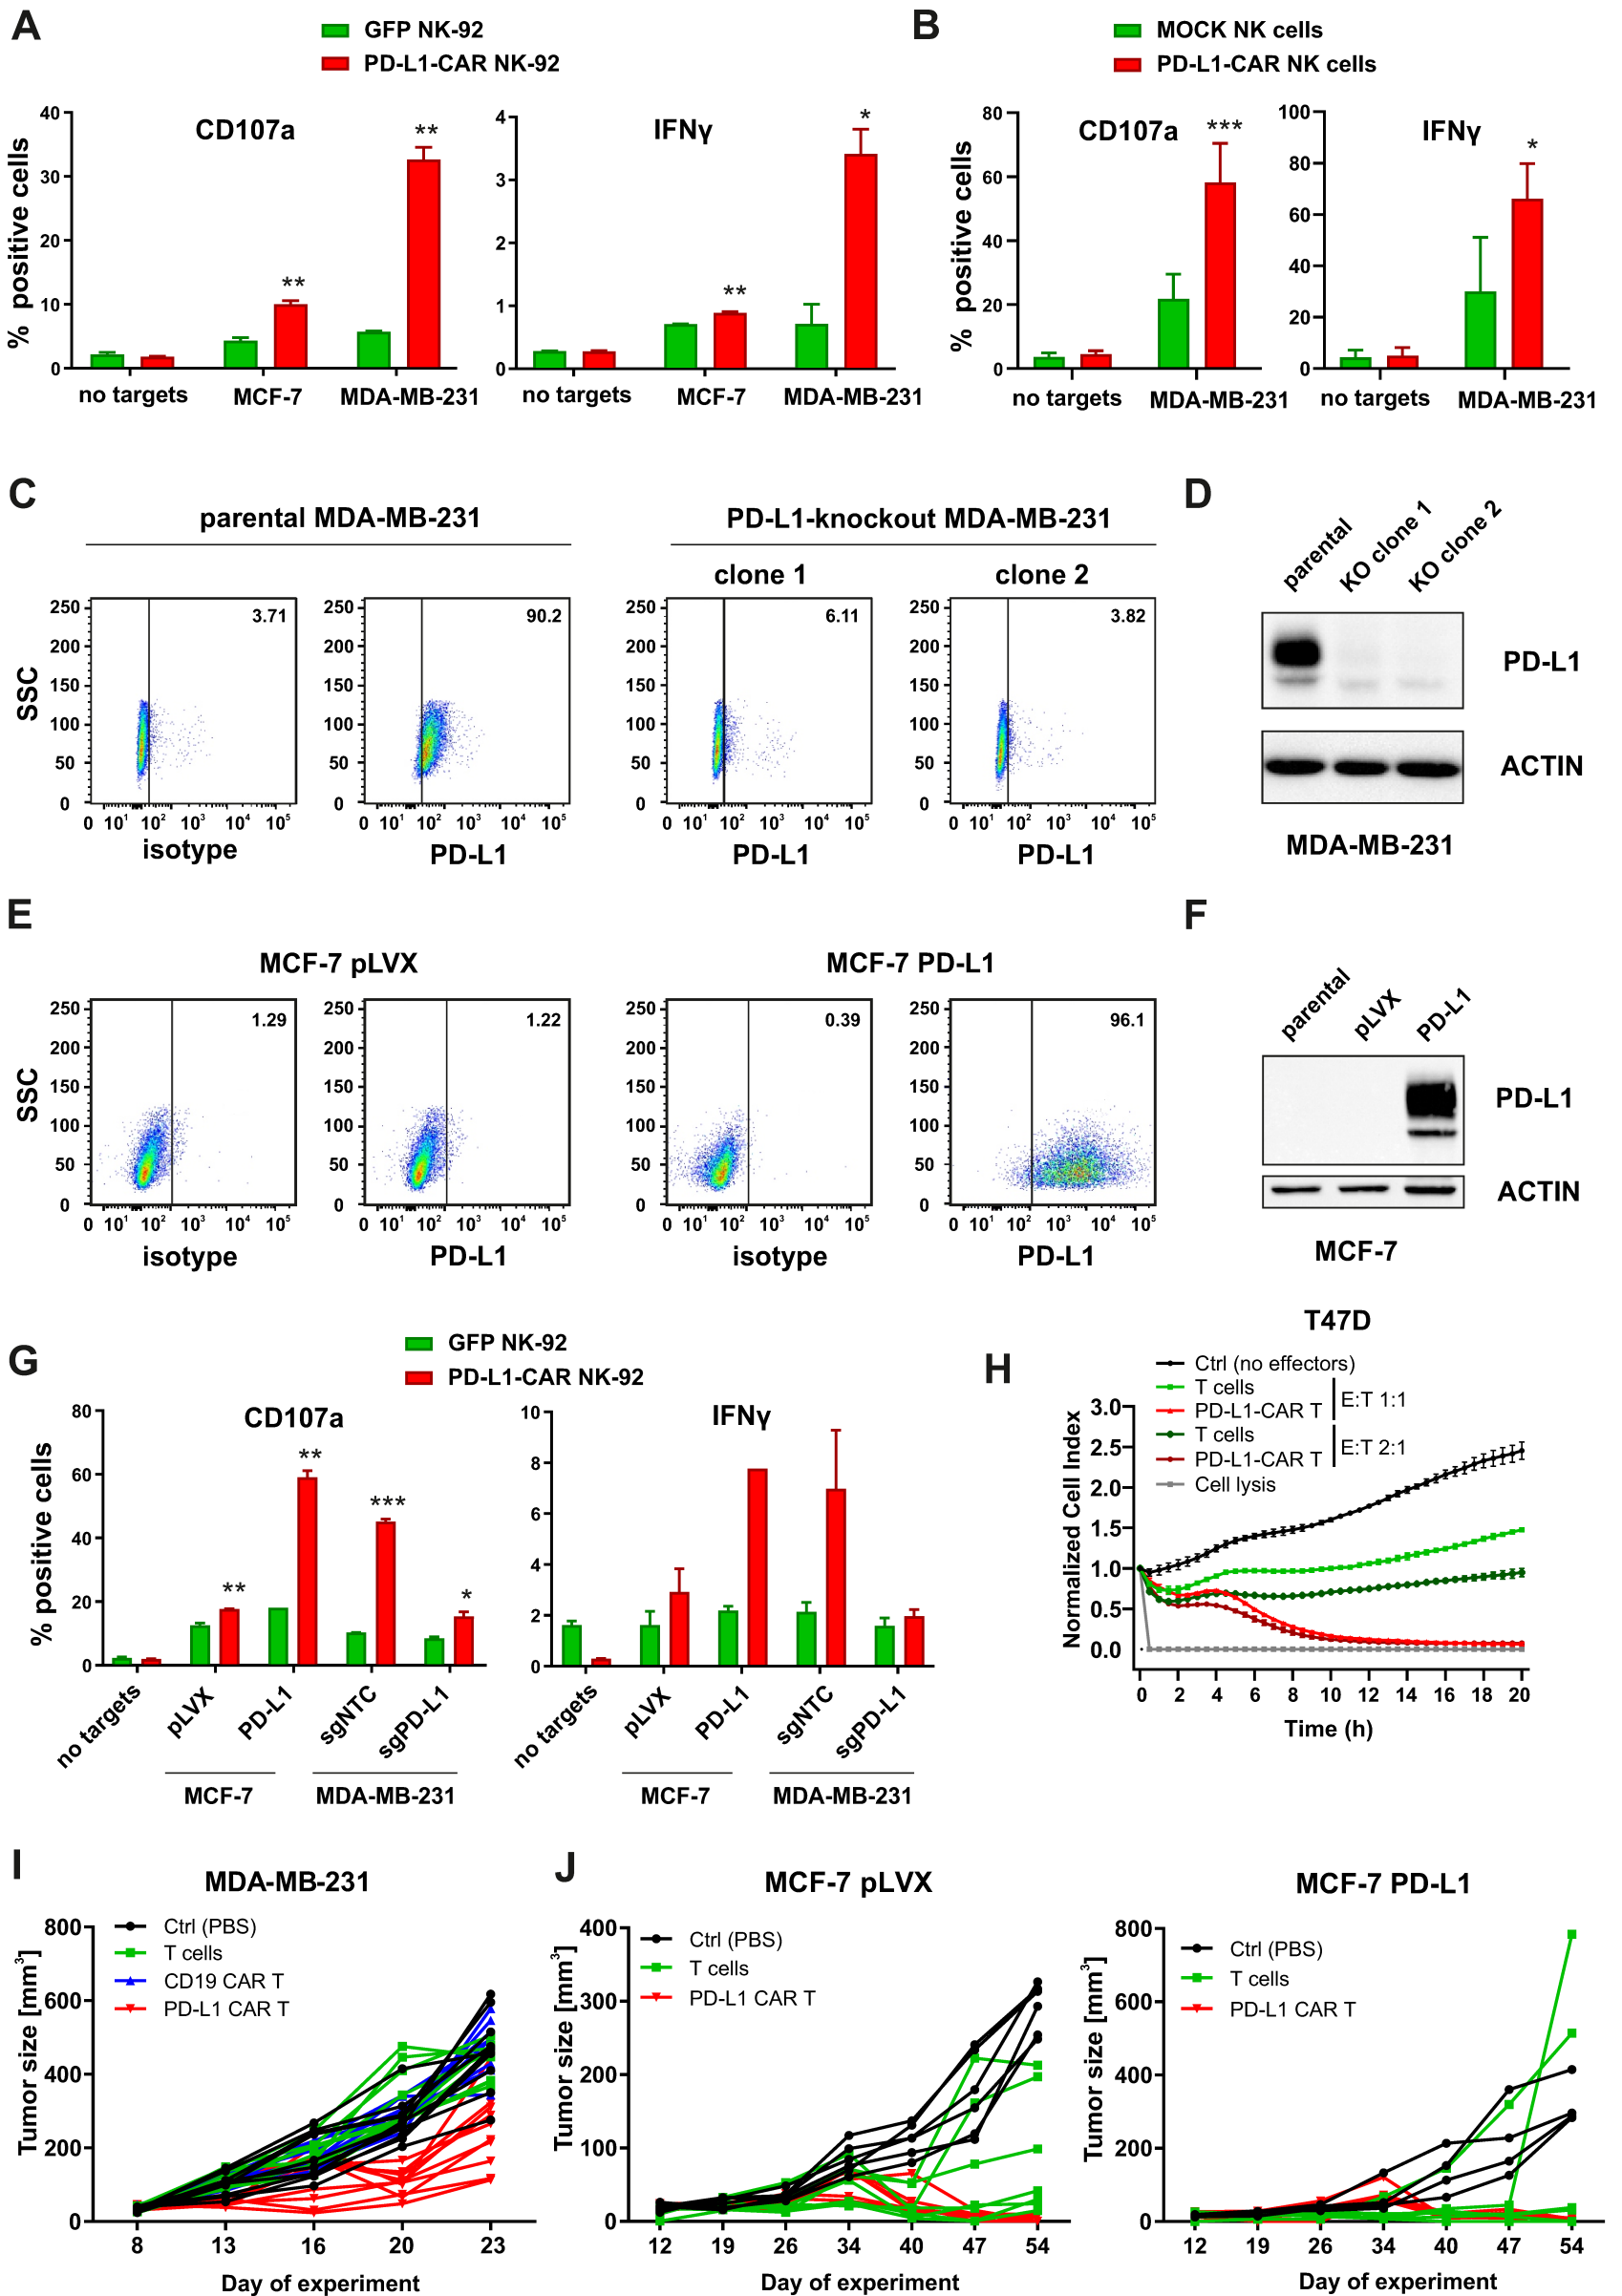

Suppl Fig.4

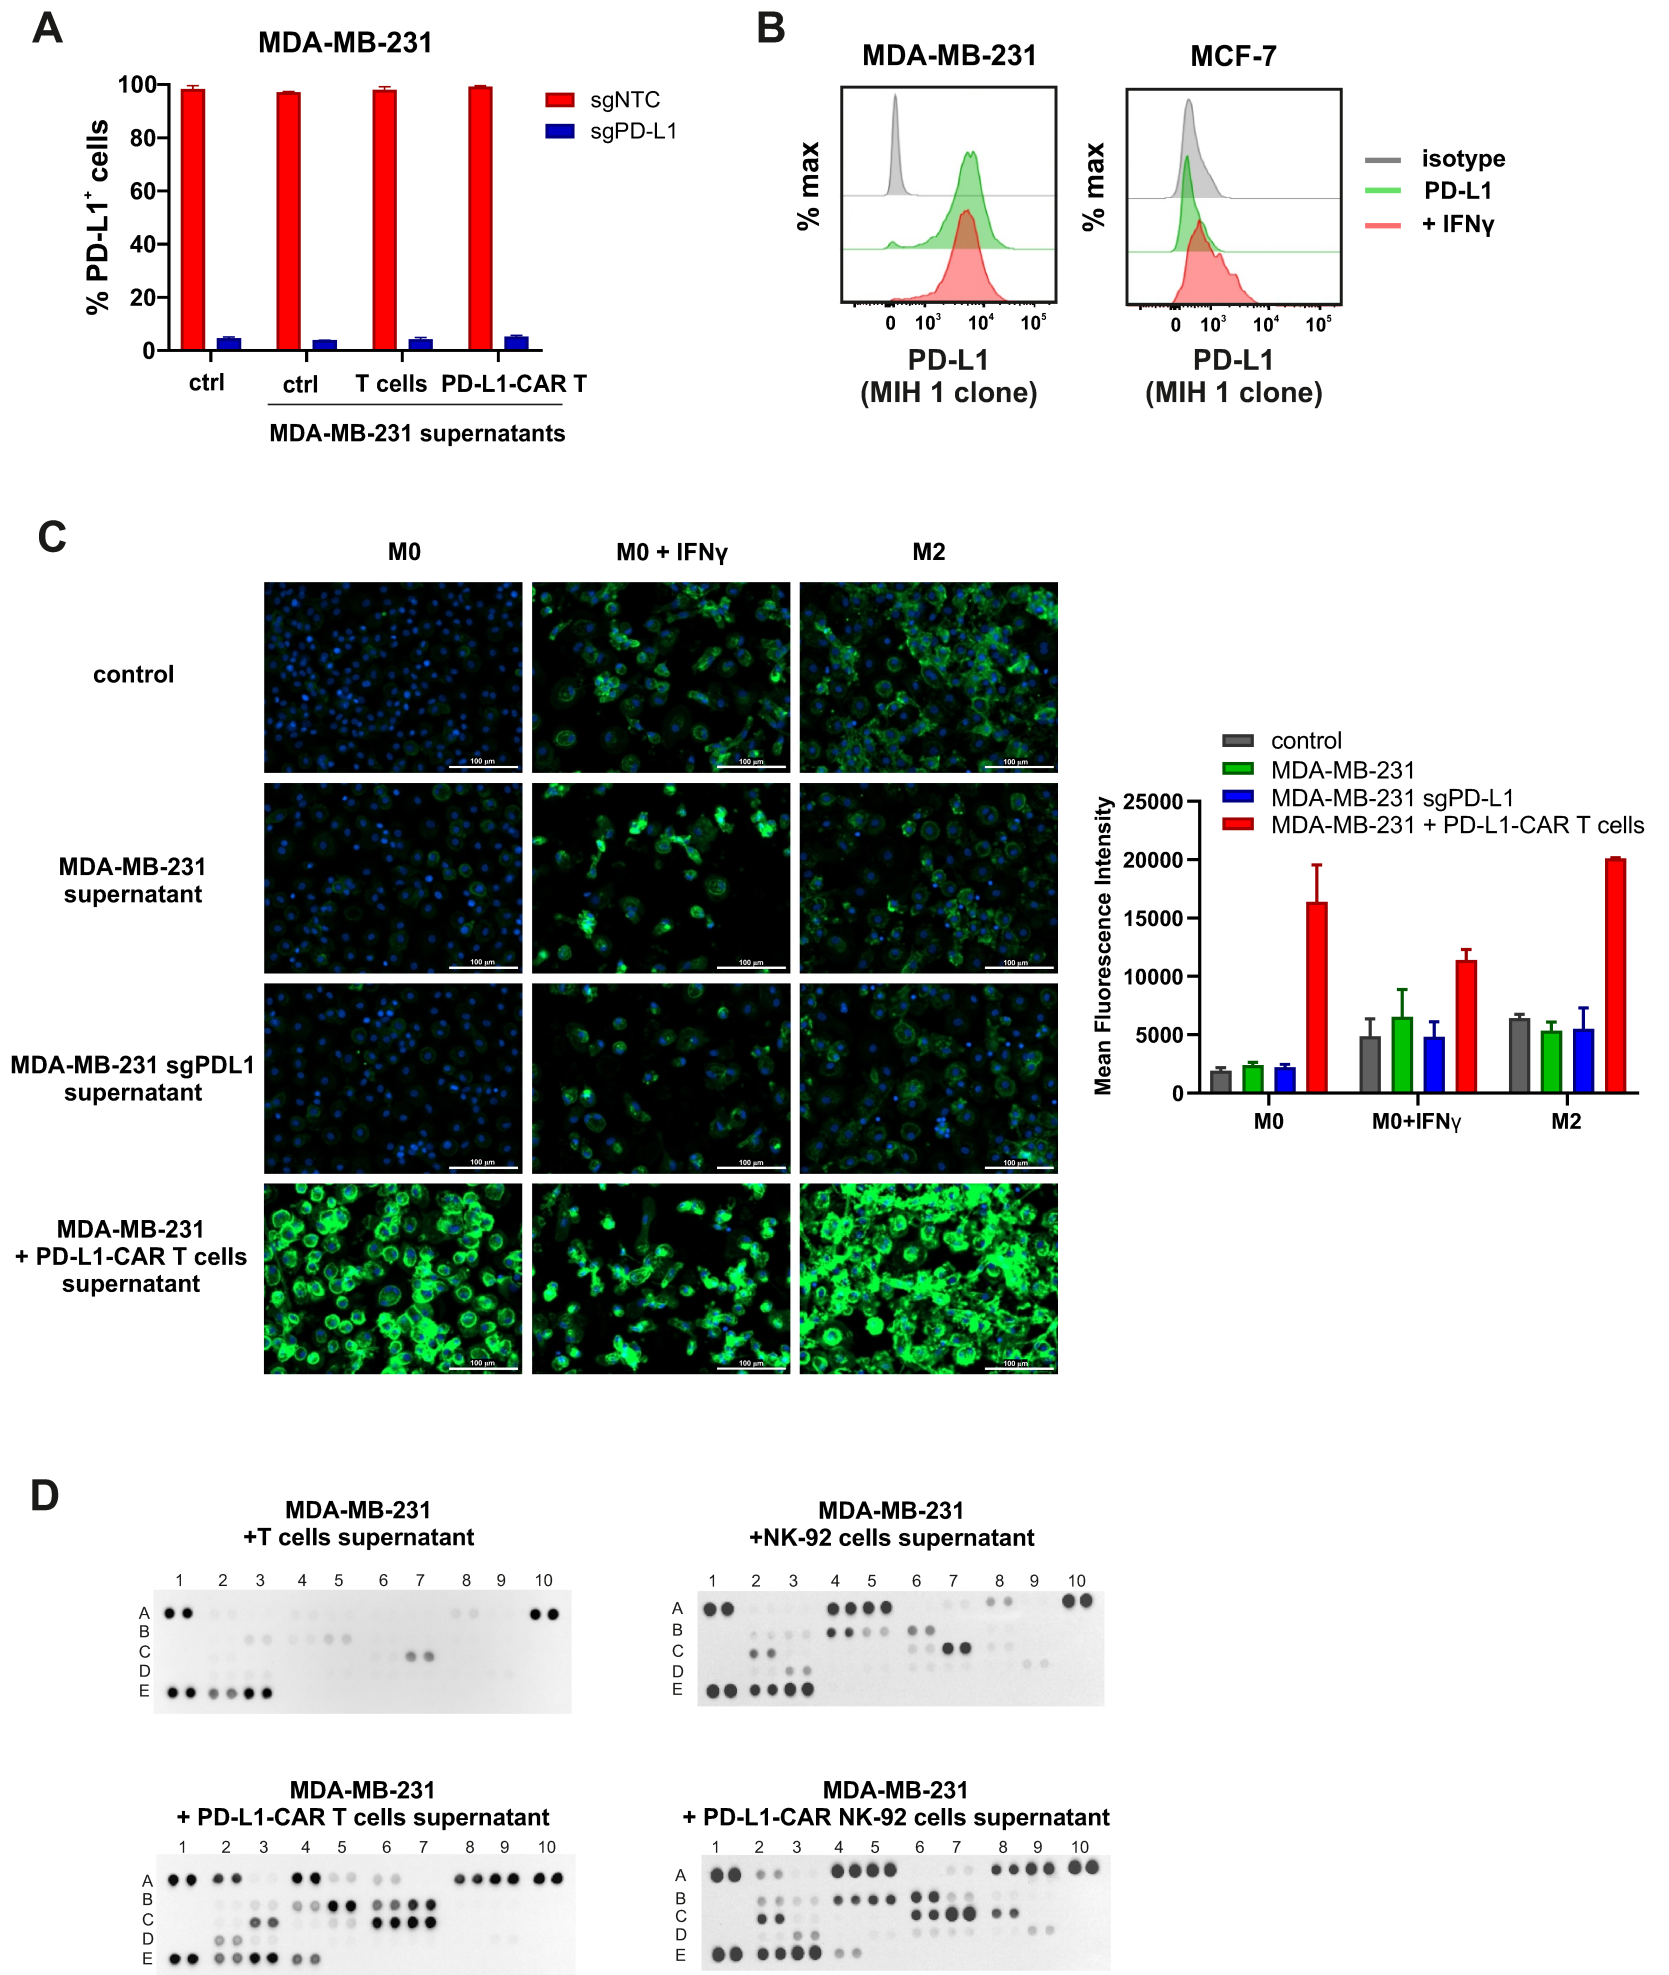

Suppl Fig.5

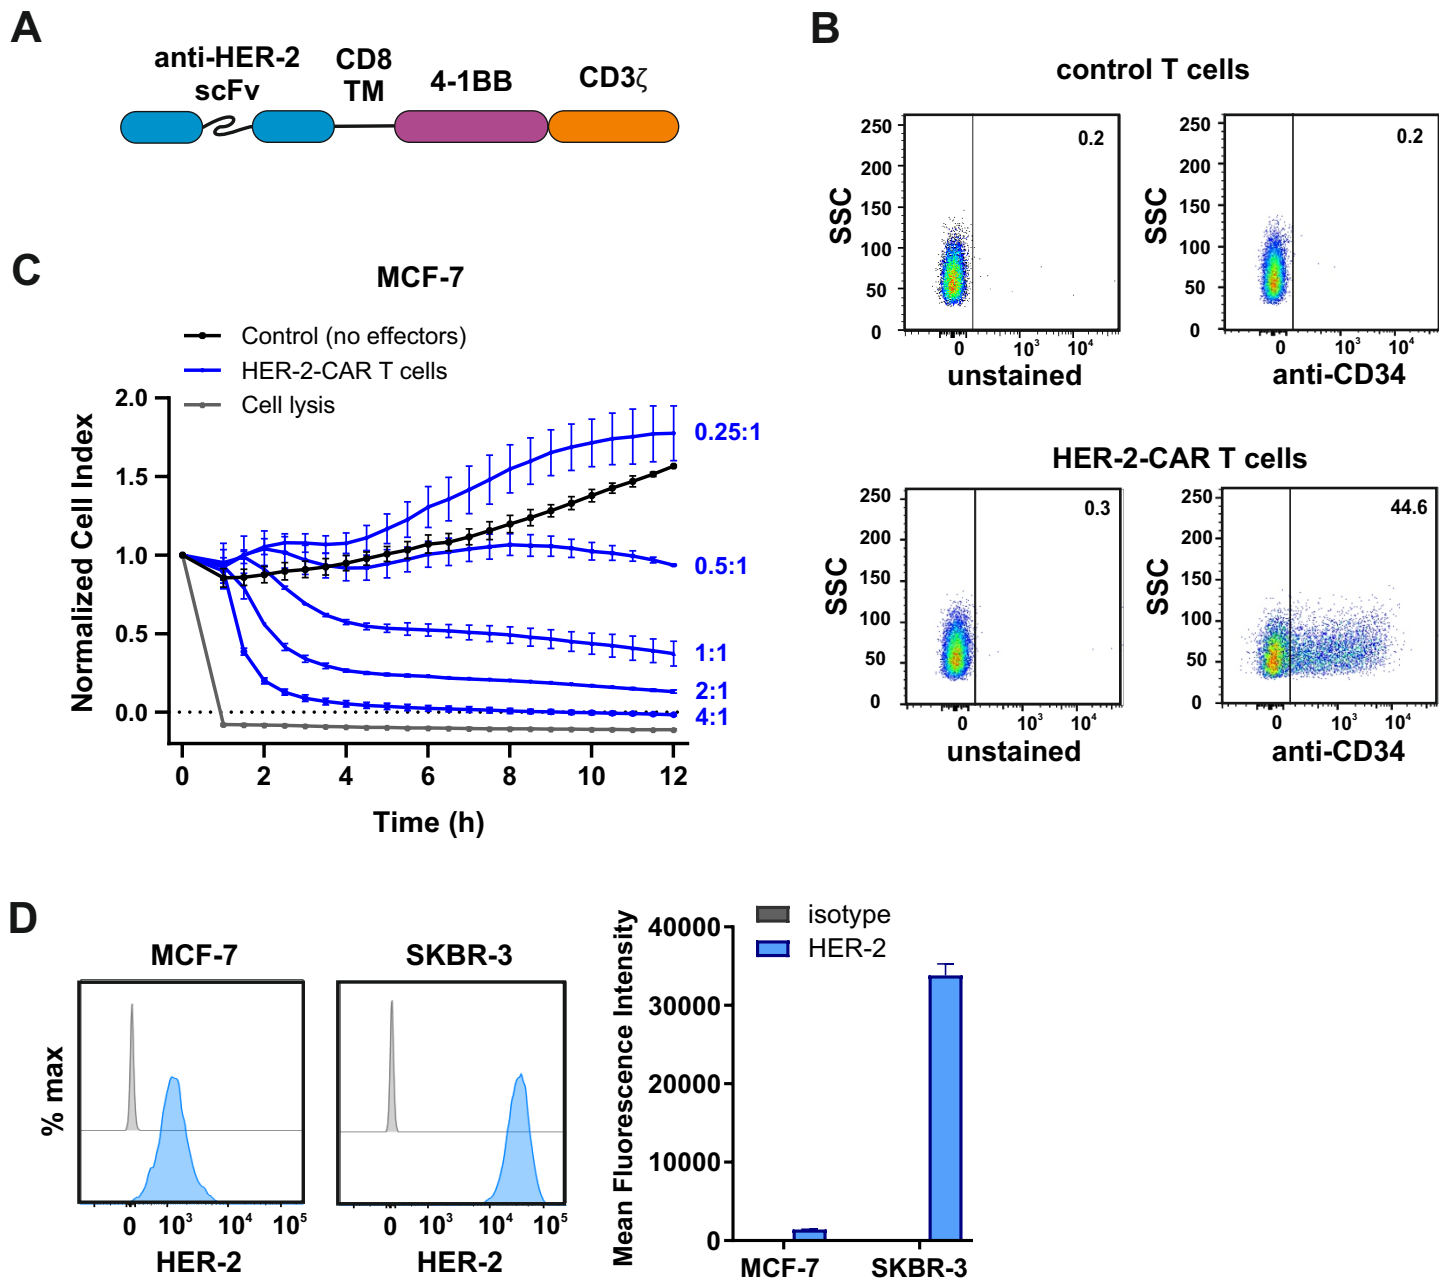

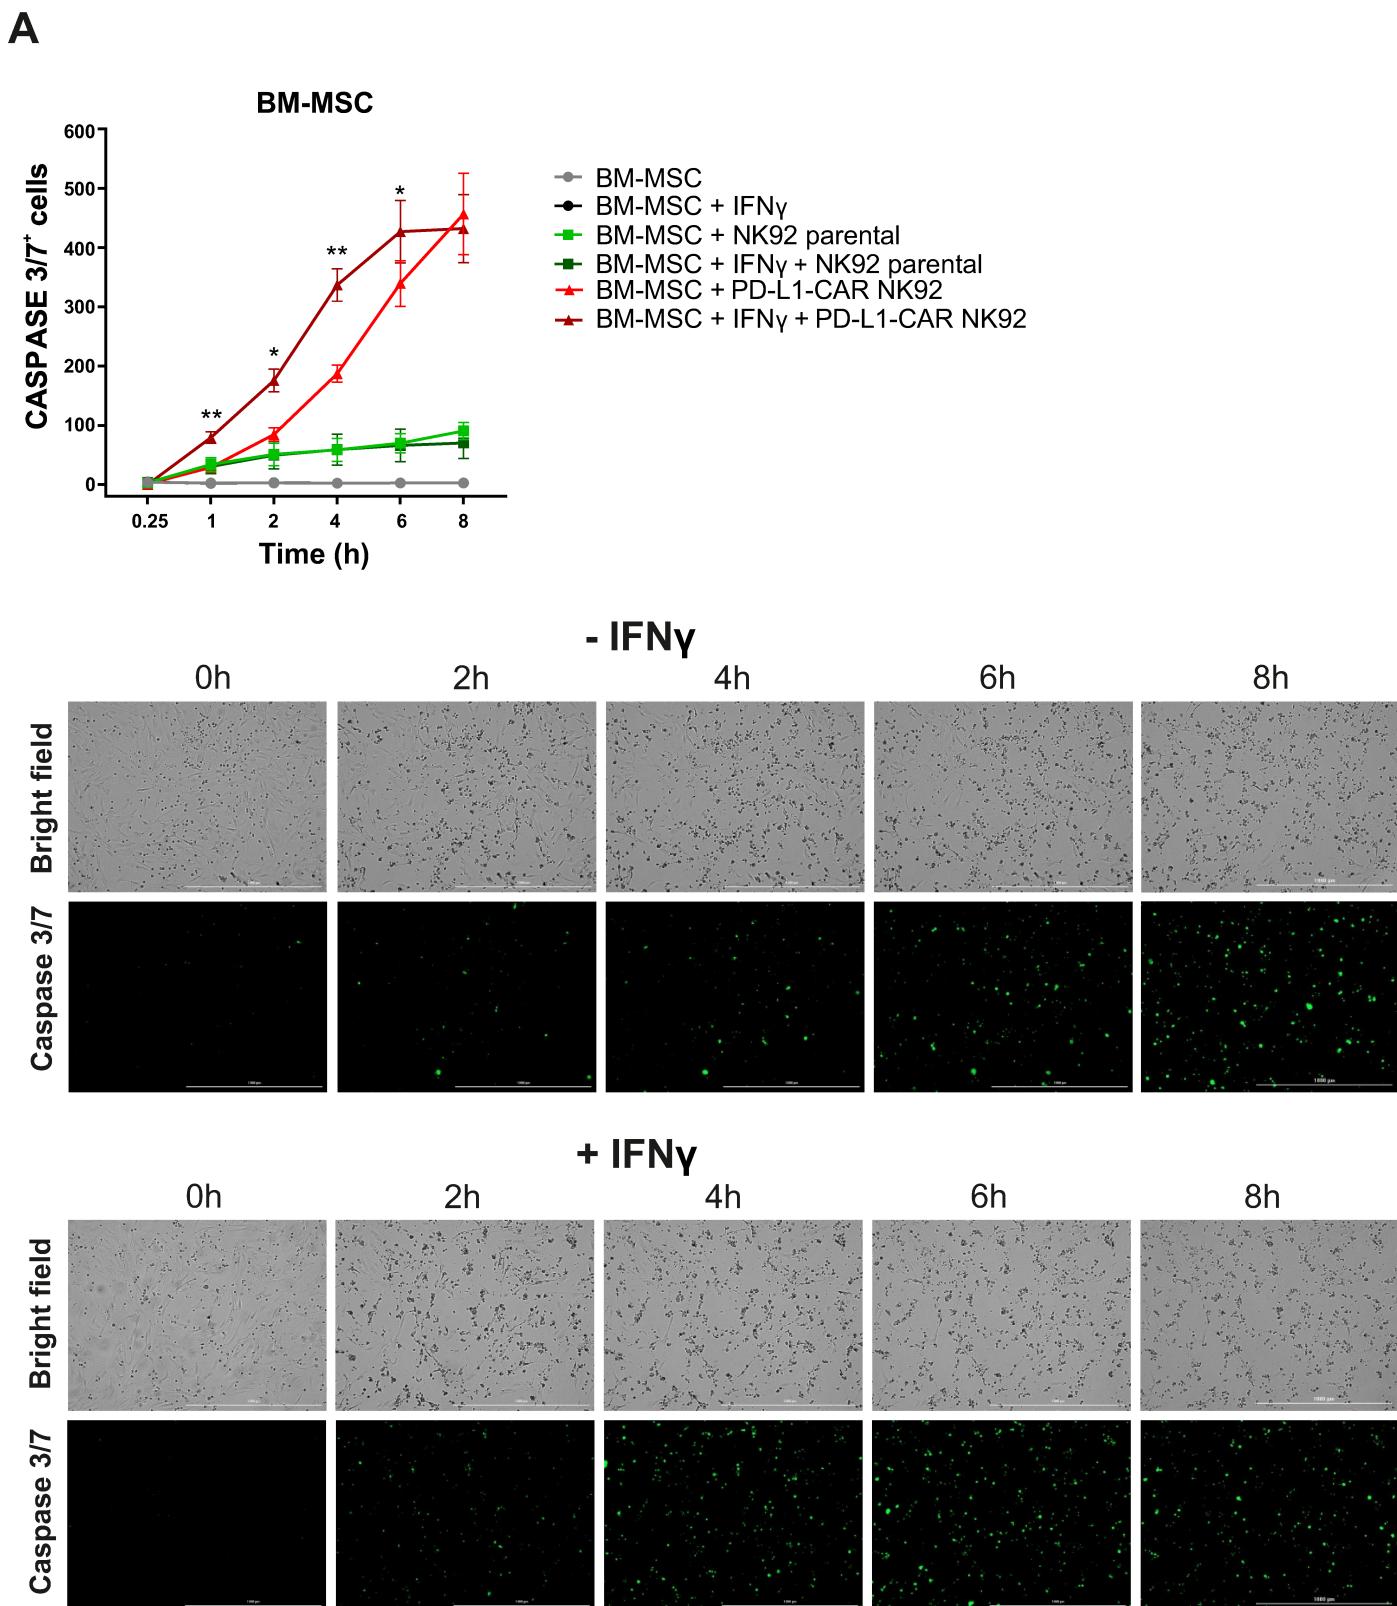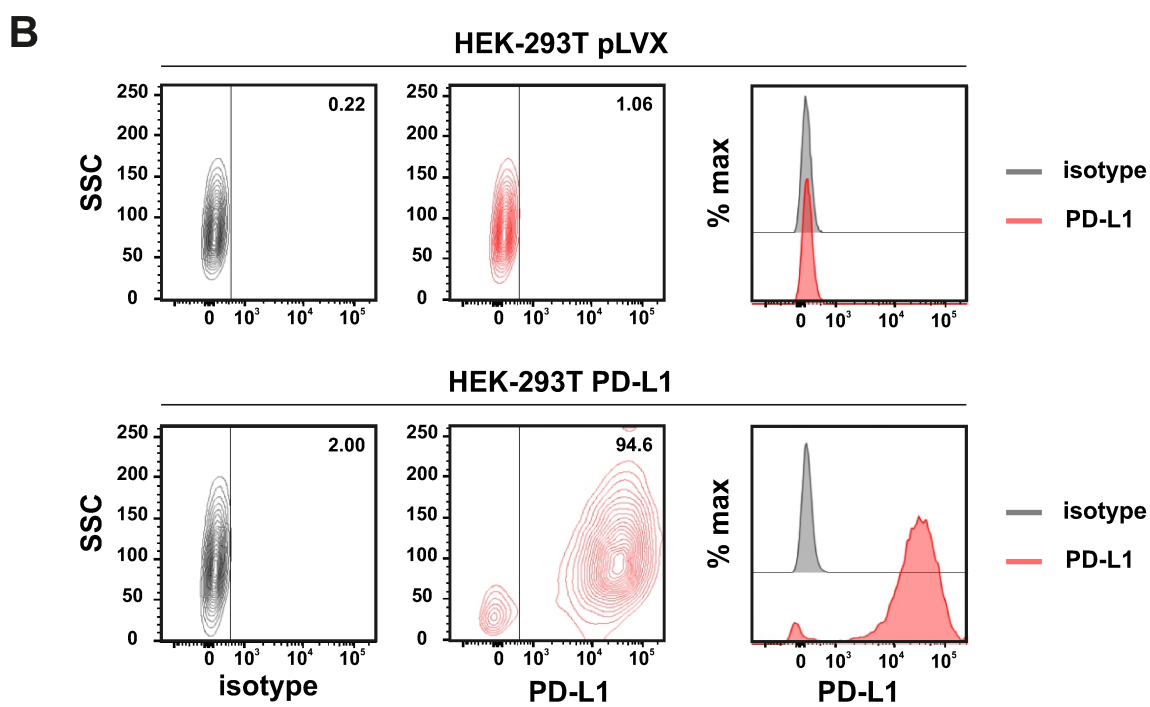

Supplement: jitc-2021-002500supp002.pdf [file jitc-2021-002500supp002.pdf]
